# Supplementary material
Source: PubMed Central journal article supplement (PMC9098692)

**Supplementary Table 1:** QC Analysis results; RIN (RNA Integrity Number) for NBC, mPIA, and sPIA samples

| <b>Animal</b> | <b>RIN value</b> |
|---------------|------------------|
| NBC Male 1    | 9.9              |
| NBC Male 2    | 9.9              |
| NBC Male 3    | 9.7              |
| NBC Male 4    | 9.9              |
| NBC Female 1  | 9.4              |
| NBC Female 2  | 9.6              |
| NBC Female 3  | 9.4              |
| NBC Female 4  | 9.4              |
| mPIA Male 1   | 9.5              |
| mPIA Male 2   | 9.5              |
| mPIA Male 3   | 9.4              |
| mPIA Male 4   | 9.4              |
| mPIA Female 1 | 9.5              |
| mPIA Female 2 | 9.5              |
| mPIA Female 3 | 9.6              |
| mPIA Female 4 | 9.6              |
| sPIA Male 1   | 9.6              |
| sPIA Male 2   | 9.4              |
| sPIA Male 3   | 9.7              |
| sPIA Male 4   | 9.2              |
| sPIA Female 1 | 9.5              |
| sPIA Female 2 | 9.7              |
| sPIA Female 3 | 9.5              |
| sPIA Female 4 | 9.6              |

**Supplementary Table 2:** TaqMan probe IDs used for qPCR

| <b>Gene Name</b> | <b>Gene Symbol</b>             | <b>TaqMan ID</b> |
|------------------|--------------------------------|------------------|
| CXCL10           | <i>CXCL10</i>                  | Mm00445235_m1    |
| EDN1             | <i>EDN1</i>                    | Mm00441242_m1    |
| IL-6             | <i>IL-6</i>                    | Mm00446190_m1    |
| CCL2             | <i>CCL2</i>                    | Mm00441242_m1    |
| IL-1 $\beta$     | <i>IL-1<math>\beta</math></i>  | Mm00434228_m1    |
| MHC II           | <i>H2-Ab1</i>                  | Mm00439216_m1    |
| TLR4             | <i>TLR4</i>                    | Mm00445273_m1    |
| Tnf- $\alpha$    | <i>Tnf-<math>\alpha</math></i> | Mm00443258_m1    |
| CREB1            | <i>CREB1</i>                   | Mm00501607_m1    |
| KCNC4            | <i>KCNC4</i>                   | Mm00521443_m1    |
| SLC2A4           | <i>SLC2A4</i>                  | Mm00436615_m1    |
| TH               | <i>TH</i>                      | Mm00447557_m1    |

**Supplementary Table 3: Top 5 physiological system and functions affected by mPIA and sPIA in males and females**

| mPIA Males                                            |                       |                | sPIA Males                                     |                     |                |
|-------------------------------------------------------|-----------------------|----------------|------------------------------------------------|---------------------|----------------|
| Name                                                  | P-value range         | Genes affected | Name                                           | Activation z-score  | Genes affected |
| Tissue Development                                    | 2.05E-.04 - 2.81E-011 | 304            | Cancer                                         | 1.08E-03 - 5.54E-09 | 171            |
| Connective Tissue Development and Function            | 2.45E-.04 - 7.31E-09  | 184            | Organ Development                              | 1.09E-03 - 5.54E-09 | 131            |
| Skeletal and Muscular System Development and Function | 2.84E-.04 - 7.31E-09  | 134            | Organismal Development                         | 6.99E-04 – 1.55E-08 | 259            |
| Immune Cell Trafficking                               | 2.79E-.04 - 8.22E-09  | 158            | Tissue Development                             | 1.06E-03 – 1.26E-07 | 250            |
| Digestive System Development and Function             | 2.32E-.04 - 8.66E-09  | 132            | Tissue Morphology                              | 1.09E-03 – 1.26E-07 | 218            |
| mPIA Females                                          |                       |                | sPIA Females                                   |                     |                |
| Name                                                  | P-value range         | Genes affected | Name                                           | P-value range       | Genes affected |
| Cardiovascular System Development and Function        | 8.85E-.03 - 2.22E-06  | 19             | Cardiovascular System Development and Function | 9.81E-04 - 1.72E-07 | 320            |
| Organ Morphology                                      | 8.93E-.03 - 2.22E-06  | 17             | Organismal Development                         | 1.07E-03 – 1.72E-07 | 542            |
| Organismal Development                                | 8.93E-.03 - 2.22E-06  | 29             | Nervous System Development and Function        | 1.07E-03 – 2.94E-07 | 387            |
| Embryonic Development                                 | 8.93E-.03 – 1.30E-05  | 10             | Behavior                                       | 1.01E-03 – 6.55E-07 | 157            |
| Hematological System Development and Function         | 8.93E-.03 – 1.30E-05  | 21             | Tissue Development                             | 9.81E-04 – 6.68E-07 | 500            |

**Supplementary Figure 1:** Principle component analysis of NBC, mPIA, and sPIA females and males.

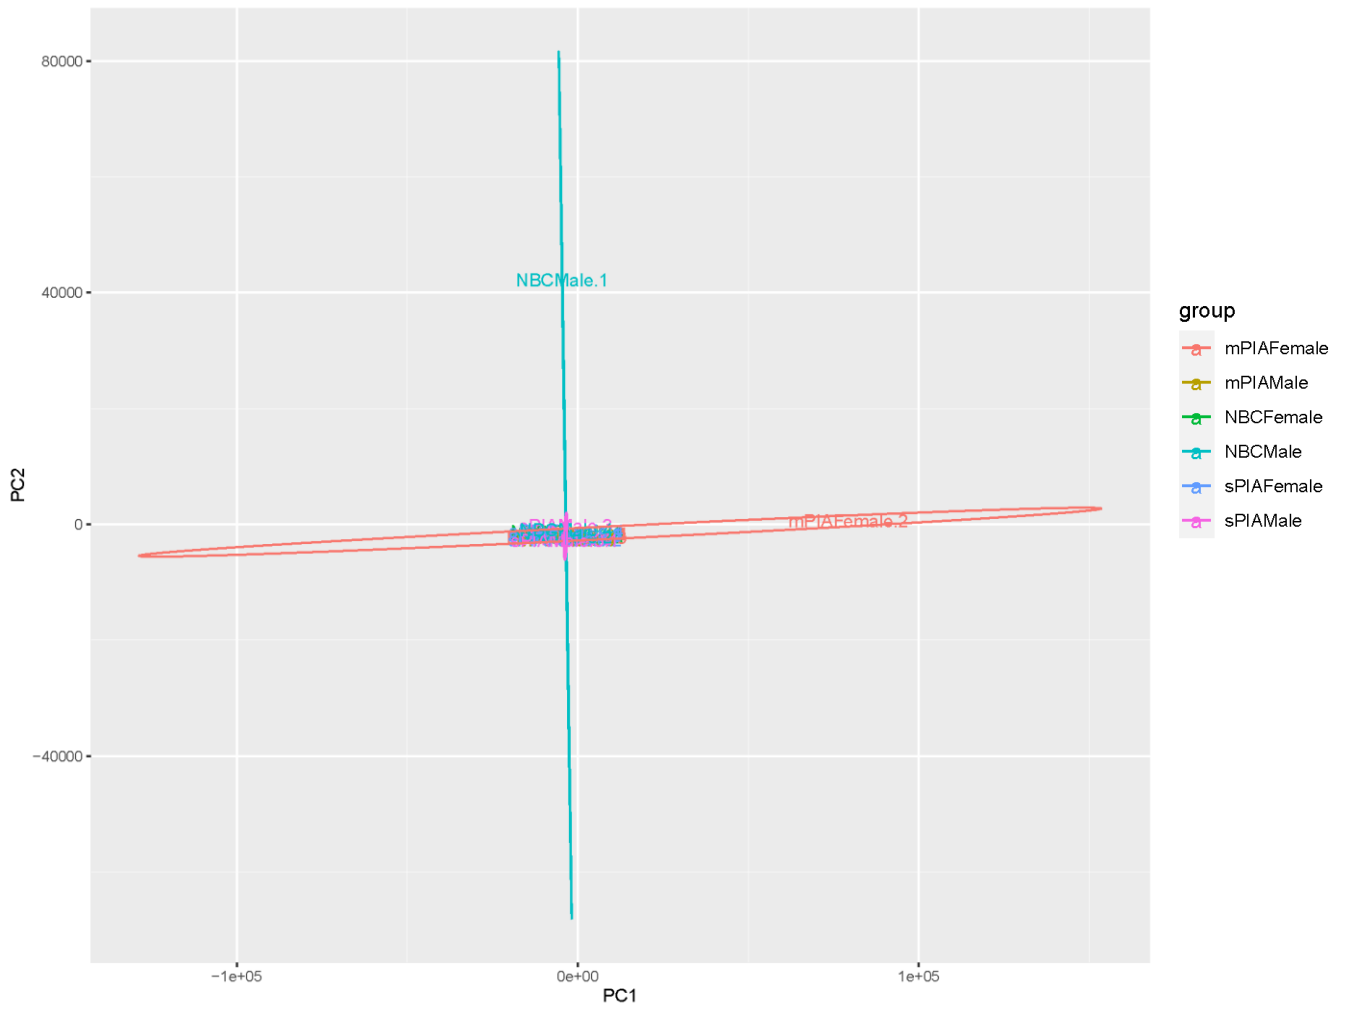

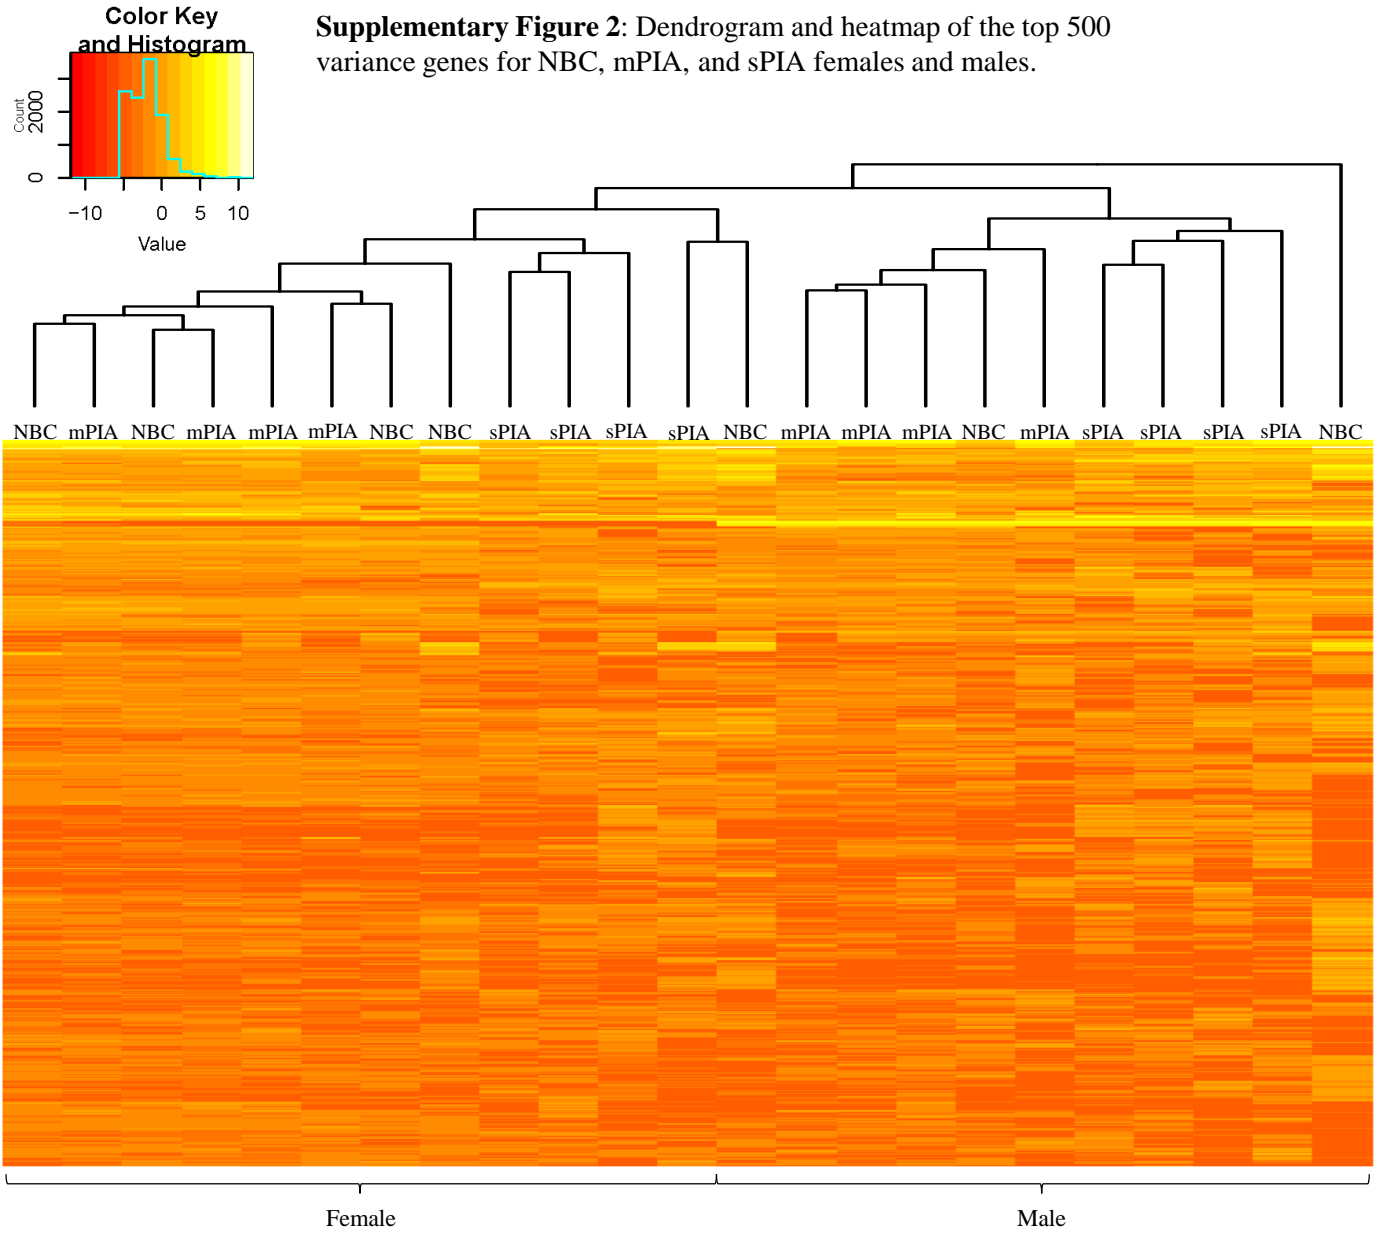

**Supplementary Figure 3:** Interaction between STAT1 and upstream regulators belonging to the IRF family with  $z$  value  $\geq 2$  (Table 2) a) Direct interaction between IRF1, IRF3, IRF5, IRF7, and STAT1. All genes influence each other and themselves in an upregulatory manner. b) There is approximately a 60% overlap between genes affected by STAT1 and genes affected by the IRF family. CXCL10, RSAD2, TNFSF10 (Tnf superfamily 10) are among genes upregulated by all 5 genes. IL-6 is upregulated by members of the IRF family and although affected by STAT1, lacks predicted directionality.

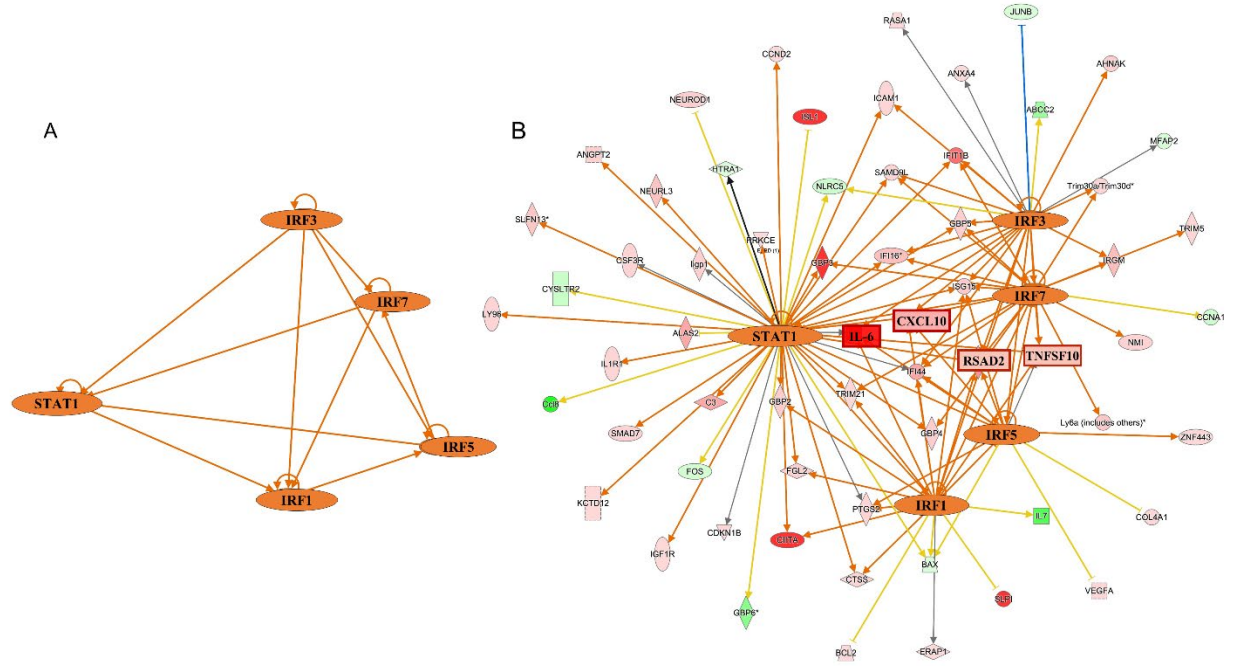

Supplement: NIHMS1751609-supplement-1.pdf [file NIHMS1751609-supplement-1.pdf]
